# Supplementary material
Source: PubMed Central journal article supplement (PMC3890885)
Supplement: 1321612111_pnas.201321612SI.pdf [file 1321612111_pnas.201321612SI.pdf]

# Supporting Information

Adelsberger et al. 10.1073/pnas.1321612111

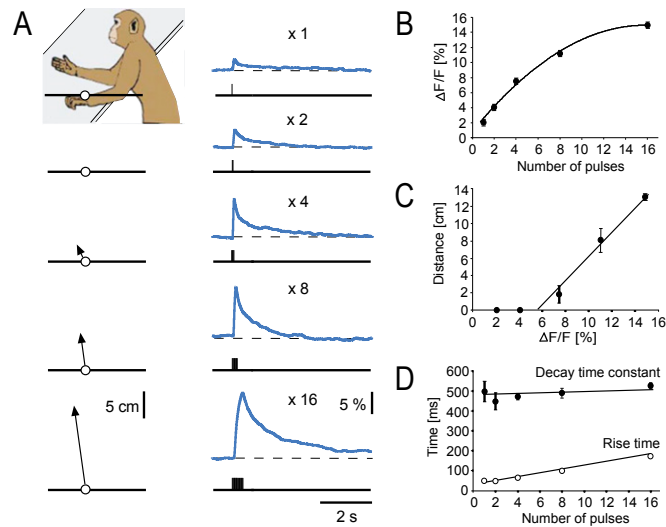

**Fig. S1.** Relation between distance of arm movement, magnitude of local cortical activity, and the number of stimuli within stimulation burst. (A) Movement responses and corresponding cortical  $\text{Ca}^{2+}$  signals during microstimulation with increasing number of stimuli as indicated (100 Hz, 25  $\mu\text{A}$ ). (B) Stimulation strength versus amplitudes of the  $\text{Ca}^{2+}$  signals. (C)  $\text{Ca}^{2+}$  signal amplitudes versus distance of arm movements. (D) Rise times and decay time constants versus number of stimulation pulses within burst. In B–D, each data point represents the average of five experimental sessions. Note that for some points the error bars are smaller than the symbols.
